# Supplementary material for: Early pregnancy exposure to endocrine disrupting chemical mixtures are associated with inflammatory changes in maternal and neonatal circulation
Source: PubMed Central journal article supplement (PMC6443771; doi:10.1038/s41598-019-41134-z), 2019-04-01
Supplement: 41598_2019_41134_MOESM1_ESM.pdf [file 41598_2019_41134_MOESM1_ESM.pdf]

## SUPPLEMENTARY MATERIAL

### **Early pregnancy exposure to endocrine disrupting chemical mixtures are associated with inflammatory changes in maternal and neonatal circulation**

Angela S Kelley<sup>1\*</sup>, Margaret Banker<sup>2\*</sup>, Jaclyn M Goodrich<sup>3</sup>, Dana C Dolinoy<sup>3,4</sup>, Charles Burant<sup>5</sup>, Steven E Domino<sup>1</sup>, Yolanda R Smith<sup>1</sup>, Peter XK Song<sup>2</sup>, Vasantha Padmanabhan<sup>1,3,6</sup>

\*Co-first authors

<sup>1</sup> Department of Obstetrics and Gynecology, University of Michigan, L4001 Women's Hospital, 1500 East Medical Center Drive, Ann Arbor, Michigan, 48109, USA. Email: [asimmen@med.umich.edu](mailto:asimmen@med.umich.edu) (AK), [sedomino@med.umich.edu](mailto:sedomino@med.umich.edu) (SD), [ysmith@med.umich.edu](mailto:ysmith@med.umich.edu) (YS)

<sup>2</sup> Department of Biostatistics, University of Michigan School of Public Health, 1415 Washington Heights, Ann Arbor, Michigan, 48109, USA. Email: [m banker@umich.edu](mailto:m banker@umich.edu) (MB), [pxsong@umich.edu](mailto:pxsong@umich.edu) (PS)

<sup>3</sup> Department of Environmental Health Sciences, University of Michigan School of Public Health, 1415 Washington Heights, Ann Arbor, Michigan, 48109, USA. Email: [gaydojac@umich.edu](mailto:gaydojac@umich.edu) (JG), [ddolinoy@umich.edu](mailto:ddolinoy@umich.edu) (DD)

<sup>4</sup> Department of Nutritional Sciences, University of Michigan School of Public Health, 1415 Washington Heights, Ann Arbor, Michigan, 48109, USA

<sup>5</sup> Department of Internal Medicine, University of Michigan, 24 Frank Lloyd Wright Drive, Ann Arbor, Michigan, 48105, USA. Email: [burantc@med.umich.edu](mailto:burantc@med.umich.edu) (CB)

<sup>6</sup> Department of Pediatrics, University of Michigan, 7510 MSRB 1, 1500 W. Medical Center Dr, Ann Arbor, MI 48109, USA. Email: [vasantha@umich.edu](mailto:vasantha@umich.edu) (VP)

**Supplemental Figure 1. Longitudinal differences between maternal baseline and term cytokine levels.**

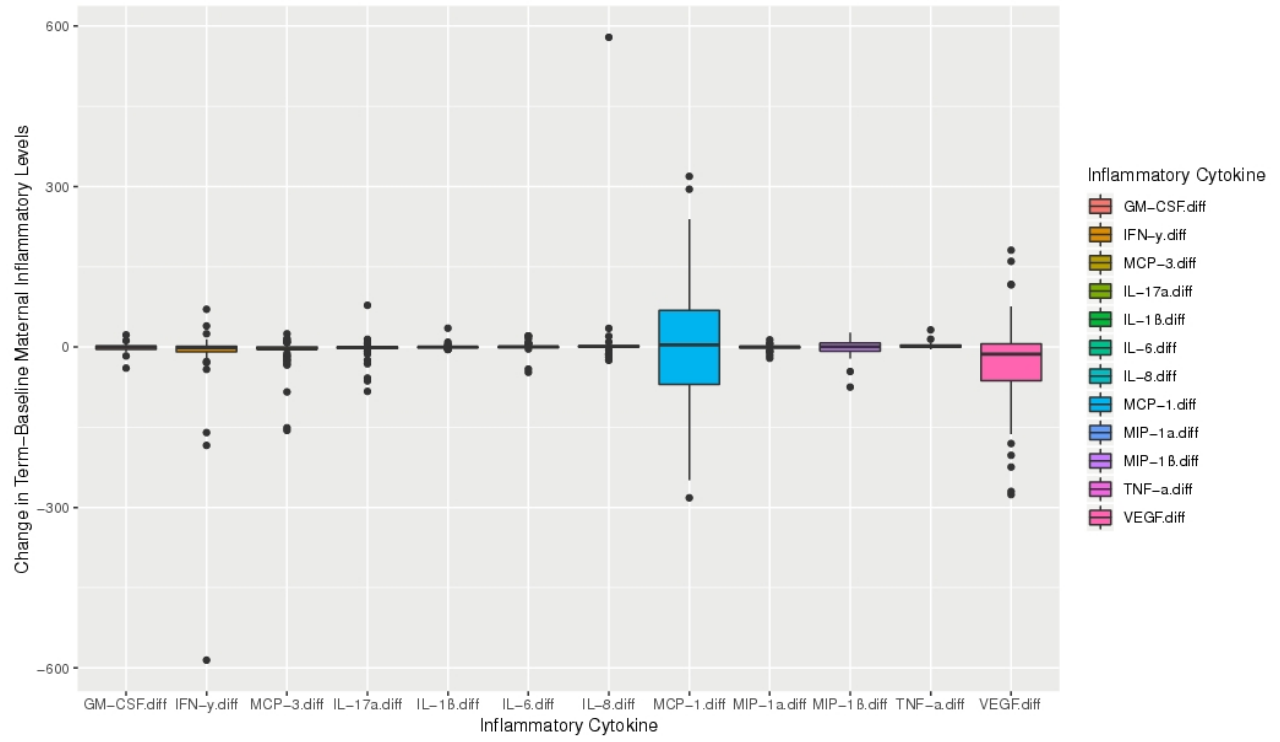

**Supplemental Figure 2. Spearman correlations between cytokines measured in first trimester, at term, and in cord blood.**

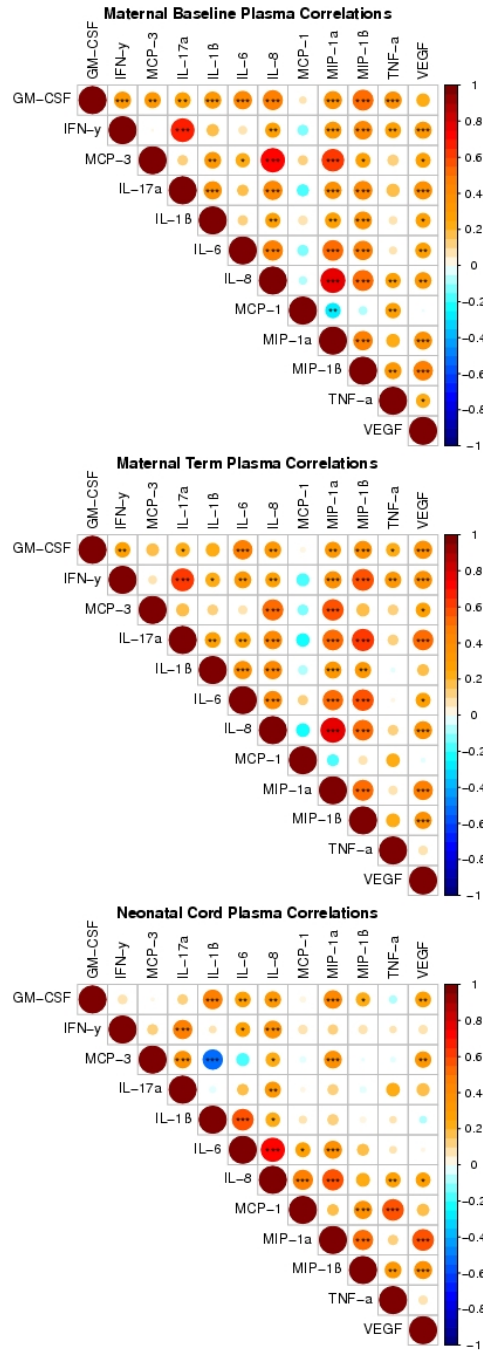

**Supplemental Table 1: Urinary measures of first trimester exposures in MMIP (n = 56\*)**

| Urinary Analyte | Geometric Mean,<br><i>ug/L</i> | 95% CI, <i>ug/L</i> |
|-----------------|--------------------------------|---------------------|
| As              | 4.30                           | (3.07, 6.00)        |
| Ba              | 5.00                           | (3.88, 6.44)        |
| Be              | 0.04                           | (0.03, 0.04)        |
| Cd              | 0.08                           | (0.07, 0.11)        |
| Cr              | 0.69                           | (0.60, 0.80)        |
| Cu              | 8.10                           | (6.64, 9.89)        |
| Hg              | 0.07                           | (0.06, 0.09)        |
| Mn              | 1.44                           | (1.20, 1.73)        |
| Mo              | 49.20                          | (38.31, 63.19)      |
| Ni              | 3.77                           | (3.06, 4.64)        |
| Pb              | 0.22                           | (0.17, 0.28)        |
| Se              | 41.63                          | (33.23, 52.15)      |
| Sn              | 0.31                           | (0.23, 0.43)        |
| Tl              | 0.16                           | (0.13, 0.20)        |
| U               | 0.01                           | (0.01, 0.01)        |
| W               | 0.16                           | (0.14, 0.17)        |
| Zn              | 169.87                         | (129.09, 223.54)    |
| MnBP            | 6.87                           | (5.11, 9.23)        |
| MBzP            | 4.20                           | (2.91, 6.06)        |
| MCOMHP          | 4.18                           | (2.89, 6.04)        |
| mCINP           | 1.29                           | (0.98, 1.71)        |
| MCPP            | 1.38                           | (0.90, 2.11)        |
| MeCPP           | 5.14                           | (3.79, 6.97)        |
| MEHHP           | 5.30                           | (3.92, 7.16)        |
| MEHP            | 1.93                           | (1.51, 2.47)        |
| MEOHP           | 2.76                           | (2.03, 3.76)        |
| MEP             | 18.04                          | (12.20, 26.67)      |
| MiBP            | 3.34                           | (2.37, 4.70)        |
| mINP            | 0.36                           | (0.34, 0.39)        |
| DCP24           | 0.40                           | (0.29, 0.54)        |
| DCP25           | 0.42                           | (0.28, 0.63)        |
| BP3             | 58.35                          | (34.52, 98.61)      |
| BPA             | 0.71                           | (0.52, 0.98)        |
| BPF             | 0.26                           | (0.20, 0.36)        |
| BPS             | 0.21                           | (0.18, 0.26)        |
| BuPB            | 0.27                           | (0.20, 0.37)        |
| EtPB            | 1.07                           | (0.57, 2.00)        |

|      |       |                |
|------|-------|----------------|
| MePB | 53.08 | (32.20, 87.49) |
| PrPB | 8.21  | (4.67, 14.42)  |
| TCC  | 0.17  | (0.14, 0.21)   |
| TCS  | 14.50 | (8.28, 25.40)  |

\*For metals, n=55.

**Supplemental Table 2. Inflammatory cytokine values measured at baseline (first trimester), term, and in cord blood.**

|                | <b>Baseline</b>      | <b>Term</b>          | <b>Umbilical Cord</b> |
|----------------|----------------------|----------------------|-----------------------|
| Cytokine       | Mean (SD)<br>(pg/mL) | Mean (SD)<br>(pg/mL) | Mean (SD)<br>(pg/mL)  |
| GM-CSF         | 7.75 (10.57)         | 7.02 (10.48)         | 2.30 (3.12)           |
| IFN- $\gamma$  | 32.47 (89.56)        | 14.64 (25.85)        | 3.39 (11.27)          |
| MCP-3          | 66.13 (126.80)       | 55.41 (101.56)       | 40.01 (90.19)         |
| IL-17 $\alpha$ | 16.16 (36.93)        | 12.05 (31.89)        | 0.67 (0.67)           |
| IL-1           | 2.10 (1.83)          | 2.46 (5.05)          | 1.03 (1.53)           |
| IL-6           | 6.60 (17.95)         | 7.00 (13.76)         | 41.78 (136.42)        |
| IL-8           | 12.10 (20.21)        | 22.01 (79.73)        | 25.62 (52.97)         |
| MCP-1          | 260.41 (90.56)       | 263.80 (93.37)       | 640.22 (527.89)       |
| MIP-1 $\alpha$ | 8.82 (9.89)          | 8.16 (8.41)          | 7.20 (8.20)           |
| MIP-1 $\beta$  | 24.03 (19.10)        | 22.25 (17.58)        | 35.18 (23.83)         |
| TNF- $\alpha$  | 6.05 (2.88)          | 8.26 (5.61)          | 17.07 (6.12)          |
| VEGF           | 114.25 (161.61)      | 82.34 (129.69)       | 69.06 (152.79)        |

**Supplemental Data for Tables 4-7**

**Supplemental Dataset - Table 4**

| <b>Model: Linear Regression - Maternal Baseline</b> |                    |                 |                       |                |
|-----------------------------------------------------|--------------------|-----------------|-----------------------|----------------|
| <i>Inflammatory Cytokine</i>                        | <i>PC Grouping</i> | <i>Estimate</i> | <i>Standard Error</i> | <i>p-value</i> |
| IL-6                                                | PC4                | 0.34            | 0.09                  | 0.00           |
| IL-1                                                | PC6                | (0.35)          | 0.11                  | 0.00           |
| IL-17 $\alpha$                                      | PC6                | (0.33)          | 0.11                  | 0.01           |
| IL-6                                                | PC11               | 0.36            | 0.12                  | 0.01           |
| IL-8                                                | PC1                | 0.15            | 0.05                  | 0.01           |
| IFN- $\gamma$                                       | PC11               | (0.44)          | 0.16                  | 0.01           |
| IL-8                                                | PC4                | 0.28            | 0.11                  | 0.02           |
| VEGF                                                | PC6                | (0.28)          | 0.12                  | 0.02           |
| IFN- $\gamma$                                       | PC1                | 0.14            | 0.06                  | 0.03           |
| IL-8                                                | PC5                | 0.24            | 0.11                  | 0.04           |
| GM-CSF                                              | PC6                | (0.24)          | 0.11                  | 0.04           |
| GM-CSF                                              | PC4                | 0.23            | 0.11                  | 0.04           |

**Supplemental Dataset - Table 5**

| <b>Model: Linear Regression - Maternal Term</b> |                    |                 |                       |                |
|-------------------------------------------------|--------------------|-----------------|-----------------------|----------------|
| <i>Inflammatory Cytokine</i>                    | <i>PC Grouping</i> | <i>Estimate</i> | <i>Standard Error</i> | <i>p-value</i> |
| IL-17 $\alpha$                                  | PC1                | 0.17            | 0.05                  | 0.00           |
| VEGF                                            | PC4                | 0.34            | 0.11                  | 0.00           |
| IL-6                                            | PC11               | 0.43            | 0.14                  | 0.01           |
| MCP-1                                           | PC1                | (0.17)          | 0.05                  | 0.01           |
| IL-17 $\alpha$                                  | PC9                | 0.37            | 0.12                  | 0.01           |
| IL-17 $\alpha$                                  | PC10               | (0.33)          | 0.12                  | 0.01           |
| MCP-1                                           | PC11               | (0.38)          | 0.14                  | 0.01           |
| IL-1                                            | PC9                | 0.36            | 0.13                  | 0.01           |
| IL-1                                            | PC2                | (0.25)          | 0.10                  | 0.02           |
| IL-6                                            | PC4                | 0.26            | 0.11                  | 0.02           |
| IL-17 $\alpha$                                  | PC4                | 0.23            | 0.10                  | 0.02           |
| IFN- $\gamma$                                   | PC1                | 0.13            | 0.06                  | 0.03           |
| MCP-1                                           | PC4                | 0.25            | 0.11                  | 0.03           |
| IL-8                                            | PC5                | 0.31            | 0.13                  | 0.03           |
| GM-CSF                                          | PC4                | 0.27            | 0.13                  | 0.04           |
| MIP-1 $\alpha$                                  | PC5                | 0.26            | 0.13                  | 0.05           |
| TNF- $\alpha$                                   | PC4                | (0.22)          | 0.11                  | 0.05           |
| MIP-1 $\alpha$                                  | PC4                | 0.25            | 0.12                  | 0.05           |
| MCP-3                                           | PC5                | 0.25            | 0.12                  | 0.05           |

**Supplemental Dataset - Table 6**

| <b>Model: Linear Regression – Neonatal Cord</b> |                    |                 |                       |                |
|-------------------------------------------------|--------------------|-----------------|-----------------------|----------------|
| <i>Inflammatory Cytokine</i>                    | <i>PC Grouping</i> | <i>Estimate</i> | <i>Standard Error</i> | <i>p-value</i> |
| MCP-3                                           | PC5                | 0.36            | 0.12                  | 0.00           |
| IL-8                                            | PC8                | (0.43)          | 0.14                  | 0.01           |
| IL-6                                            | PC11               | 0.36            | 0.14                  | 0.01           |
| MCP-3                                           | PC1                | 0.14            | 0.06                  | 0.02           |
| MCP-1                                           | PC8                | (0.34)          | 0.15                  | 0.03           |
| VEGF                                            | PC7                | 0.33            | 0.14                  | 0.03           |
| MIP-1 $\alpha$                                  | PC10               | 0.31            | 0.14                  | 0.03           |
| IL-1                                            | PC11               | 0.31            | 0.14                  | 0.04           |
| MIP-1 $\alpha$                                  | PC7                | 0.29            | 0.13                  | 0.04           |
| IL-8                                            | PC10               | 0.29            | 0.14                  | 0.05           |
| GM-CSF                                          | PC7                | 0.30            | 0.14                  | 0.05           |



**Supplemental Dataset - Table 7**

| <b>Model: LMM - Main Effects</b>       |                    |                 |                       |                |
|----------------------------------------|--------------------|-----------------|-----------------------|----------------|
| <i>Inflammatory Cytokine</i>           | <i>PC Grouping</i> | <i>Estimate</i> | <i>Standard Error</i> | <i>p-value</i> |
| IL-17 $\alpha$                         | PC6                | (0.33)          | 0.10                  | 0.00           |
| IL-1                                   | PC6                | (0.32)          | 0.11                  | 0.01           |
| IL-6                                   | PC4                | 0.30            | 0.10                  | 0.01           |
| IFN- $\gamma$                          | PC11               | (0.43)          | 0.15                  | 0.01           |
| IL-6                                   | PC11               | 0.37            | 0.13                  | 0.01           |
| VEGF                                   | PC6                | (0.29)          | 0.11                  | 0.02           |
| IFN- $\gamma$                          | PC1                | 0.13            | 0.05                  | 0.02           |
| IL-17 $\alpha$                         | PC1                | 0.11            | 0.05                  | 0.02           |
| IL-8                                   | PC1                | 0.13            | 0.06                  | 0.03           |
| TNF- $\alpha$                          | PC1                | 0.12            | 0.05                  | 0.04           |
| GM-CSF                                 | PC4                | 0.24            | 0.12                  | 0.05           |
| IL-8                                   | PC4                | 0.25            | 0.12                  | 0.05           |
| GM-CSF                                 | PC6                | (0.24)          | 0.12                  | 0.06           |
| VEGF                                   | PC4*time           | 0.22            | 0.10                  | 0.04           |
| IL-17 $\alpha$                         | PC2*time           | (0.16)          | 0.08                  | 0.05           |
| <b>Model: LMM - Interaction Effect</b> |                    |                 |                       |                |
| <i>Inflammatory Cytokine</i>           | <i>PC Grouping</i> | <i>Estimate</i> | <i>Standard Error</i> | <i>p-value</i> |
| MCP-1                                  | PC1*time           | (0.15)          | 0.04                  | 0.00           |
| TNF- $\alpha$                          | PC1*time           | (0.11)          | 0.03                  | 0.00           |
| IL-1                                   | PC4*time           | (0.28)          | 0.09                  | 0.00           |
| IFN- $\gamma$                          | PC11*time          | 0.50            | 0.16                  | 0.00           |
| MIP-1 $\beta$                          | PC2*time           | (0.19)          | 0.07                  | 0.01           |
| MIP-1 $\beta$                          | PC1*time           | (0.07)          | 0.03                  | 0.01           |
| IL-1                                   | PC6*time           | 0.25            | 0.09                  | 0.01           |
| MIP-1 $\alpha$                         | PC10*time          | (0.18)          | 0.07                  | 0.02           |
| MIP-1 $\alpha$                         | PC6*time           | 0.14            | 0.06                  | 0.02           |
| MIP-1 $\beta$                          | PC6*time           | 0.21            | 0.09                  | 0.03           |
| IL-8                                   | PC10*time          | (0.26)          | 0.11                  | 0.03           |
| IL-1                                   | PC9*time           | 0.24            | 0.11                  | 0.04           |
| VEGF                                   | PC4*time           | 0.22            | 0.10                  | 0.04           |
| IL-17 $\alpha$                         | PC2*time           | (0.16)          | 0.08                  | 0.05           |
